# Supplementary material
Source: publisher figshare collection journal article supplement (https://geolsoc.figshare.com/ndownloader/files/14298983)
Supplement: Supplementary file 1 [file 14298983]

## Sheet: Sheet1
Ch. 4, Table S3 Volcanic rocks XRF
Sample	NZ13-35	N13 36	N13 39	N13 41	N13 42	N13 43	NZ13-45	NZ13-142	NZ13-143	NZ13-145	NZ13-146	N13 147	N13 148	N13 149	N13 162	N13 164	N13 167	NZ13-168	N13 169	N13 170	N13 171		NZ13-228	NZ13-235
Rock type	basaltic dyke	basalt flow	basaltic dyke	baasalt flow	basalt flow	basaltic dyke	pillow basalt	basalt	andesite	Redcliff stream	Redcliff stream	dolerite dyke	dolerite dyke	dolerite dyke	basalt flow	basalt flow	dolerite dyke	diorite	dolerite dyke	basalt flow	basalt flow		basaltic andesite
Area								Redcliff stream	Redcliff stream	Brunel Fm.	Brunel Fm.	Redcliff Creek	Redcliff Creek	Redcliff Creek	Princhester Creek	Princhester Creek	Princhester stream	Princhester stream	Princhester Creek	Princhester Creek	Princhester Creek		Grampian Reserve	Grampian Reserve
Stratigraphy								Brunel Fm.	Brunel Fm.	Takitimu Mtns.	Takitimu Mtns.	Brunel Fm.	Brunel Fm.	Brunel Fm.	Elbow Fm.	Elbow Fm.	Elbow Fm.		Elbow Fm.	Elbow Fm.	Elbow Fm.		Grampain Fm.	Grampian Fm.
Region	Riverton	Riverton	Riverton	Riverton	Riverton	Riverton	Riverton	Takitimu Mtns.	Takitimu Mtns.	Takitimu Mtns.	Takitimu Mtns.	Takitimu Mtns.	Takitimu Mtns.	Takitimu Mtns.	Takitimu Mtns.	Takitimu Mtns.	Takitimu Mtns.	Takitimu Mtns.	Takitimu Mtns.	Takitimu Mtns.	Takitimu Mtns.		Nelson area	Nelson region
	S46 38440 E168 03785	S46 38440 E168 03785	S46 38287E168 03798	S46 38084 E168 03566	S46 37965 E168 03239	S46 37332 E168 03043	S46 38081 E168 99844	S445 73016E167 74447	S445 73016E167 74447	S445 73016 E167 74447	S445 73016 E167 74447	S445 73016E167 74447	S445 73016E167 74447	S445 73016 E167 74447	S445 61211 E167 92558	S445 61387 E167 92181	S445 61211 E167 91676	S445 61211 E167 91676	S445 61264 E167 91516	S445 60752 E167 93177	S445 60752 E167 93177		S41 29440 E173 28706	S41 29385 E173 28394
Major elements
SiO2	50.42	53.47	48.68	49.49	50.3404	50.2198	49.13	52.69	64.21	49.83	51.7876	48.53	48.43	51.4898	51.354	55.94	47.2	52.73	51.4315	55.2	54.01		46.535	49.93
Al2O3	15.75	14.15	14.37	16.47	15.6177	14.7333	18.18	17.02	13.61	20.21	16.7935	16.84	17.26	16.8973	19.6128	17.39	18.29	15.79	18.7657	15.47	16.16		10.1871	9.01
Fe2O3	10.09	7.52	9.97	9.14	9.5073	9.4872	9.99	8.73	6.51	7.93	8.95455	9.83	9.82	8.2618	4.212	7.55	8.92	10.64	8.58685	10.48	10.51		2.76045	1.61
MgO	5.19	7.56	9.1	6.72	5.51745	7.1355	4.72	6.1	1.97	6.35	6.8742	7.42	5.87	5.3429	4.6332	3.05	5.99	5.25	4.8357	4.24	3.88		1.1088	0.6
CaO	9.67	9.48	8.95	9.1	10.5525	9.85905	5.04	4.28	3.3	2.2	5.2461	7.45	8.13	8.4739	10.26	6.98	12.62	6.3	10.0794	7.4	9.18		19.7158	19.36
Na2O	4.63	4.32	3.44	4.05	2.86425	3.3165	4.51	4.81	4.55	3.16	4.3617	3.68	3.43	4.6359	3.9528	5.33	2.3	3.29	2.71635	3.14	2.73		2.0559	1.7
K2O	0.196	0.056	0.526	0.428	0.03417	0.356775	2.794	0.653	2.062	3.531	1.33966	0.808	1.455	0.44137	1.00008	0.365	0.871	0.791	0.38208	0.394	0.324		1.5373	2.09
TiO2	1.028	0.636	0.734	0.796	0.69546	0.758775	1.024	0.91	0.996	0.922	0.64521	1.454	1.643	1.39885	1.14804	1.066	0.68	0.987	0.66267	0.86	1.006		0.33495	0.249
MnO	0.148	0.127	0.161	0.146	0.171855	0.163815	0.138	0.149	0.108	0.127	0.16281	0.122	0.152	0.12322	0.19548	0.179	0.156	0.169	0.166165	0.169	0.192		0.042735	0.032
P2O5	0.163	0.089	0.113	0.1	0.123615	0.097485	0.168	0.201	0.272	0.324	0.189945	0.241	0.239	0.20604	0.32616	0.516	0.198	0.238	0.172135	0.208	0.2		0.06699	0.06
LOI	2.49	2.61	3.45	3.06	4.18	3.53	3.85	4.09	2.15	4.89	3.21	3.51	3.13	2.51	2.78	1.24	2.22	3.63	1.93	2.23	1.66		15.07	15.27
Total	99.775	100.018	99.494	99.5	99.6047	99.6582	99.544	99.633	99.738	99.474	99.5654	99.885	99.559	99.7811	99.4746	99.606	99.445	99.815	99.7286	99.791	99.852		99.415	99.911
Trace elements
Zn	81	52.7	78.7	67.6	74	73.3	77.6	71	75.6	86.1	86.1	67.5	77.5	46.1	91.3	94.2	72.8	90.2	67.6	73.1	94.7		73.7	52.3
Cu	98.8	76.6	136.7	97.4	186.3	99.5	116.6	26.3	59.5	10	10	70	63	12.7	128.4	21.1	143.4	109.2	84.9	170.9	202.9		13.8	11.5
Ni	48.8	101.8	137.3	44.5	23.8	49.8	43.2	43.2	11.5	25.3	25.3	77.8	43.9	50.5	24.6	13.8	48.9	15.9	21	16.2	15.3		15.3	12.9
Cr	136.4	293.1	419.9	69	25.6	102.3	50.8	47.6	14.7	20.9	20.9	179.6	92.4	101.7	30	11.6	83.4	29.9	25.1	26.4	27.8		27.7	22.3
V	323.8	214.6	302	288.2	258.6	286.4	281.2	290.1	93.5	203.3	203.3	338.1	338.2	294.6	312.2	162.2	264.4	305.3	216.3	321.5	327.3		47.8	33.9
Ba	20.5	7.4	43	37	5.2	30.9	105.7	44.8	138.1	207.3	207.3	53.2	125.3	39.2	77.3	39.9	62.4	103.1	55.8	53.4	41.6		238.9	269.3
Sc	35.5	32.9	48.9	45.1	35.7	44.6	37.2	38.5	17.5	21.9	21.9	35.1	37.3	34.7	31	17.1	27.7	38	28.4	34.2	36.8		14.8	11.5
La	1.2	1	3.2	n.d.	4.1	0.9	1.7	5.1	20.3	6.6	6.6	7.2	7.1	5	5.9	10.1	5.4	7.1	2.9	5.9	6.3		23.7	20.6
Ce	17.6	5.3	9.6	10.7	9.9	7.6	12.4	14.2	58.1	23.3	23.3	23.2	22.9	18.9	20.3	32.9	15.5	24.4	8.2	20.4	18.3		52.9	48.6
Nd	11.3	6.9	7.6	6.6	8.8	6.1	8.3	11.2	35.1	16	16	15.7	16.6	14.9	17.5	22.9	12.1	16	9.9	14.7	13.2		26.6	24.1
U	0.2	-0.1	n.d.	n.d.	n.d.	n.d.	0	0	0.9	-0.2	-0.2	0.2	0	-0.1	-0.2	0.3	0.5	-0.2	0	0.1	0.3		2.3	2.3
Th	4.2	0.2	0.6	1	1.2	1.6	1.1	0.4	2.2	1	1	1.5	0.9	1.1	0.3	0.5	0.5	2.1	0.6	1.8	-0.2		9.4	8.9
Pb	0	1.1	0.8	0.7	0.5	0.8	0.4	1	2.9	0.8	0.8	0.8	1.4	1.1	1.8	3.2	1.9	2.5	1.4	1.5	2.4		13.3	13.1
Nb	2.4	1.3	0.9	1.2	1	1.1	1.7	3.8	12.7	8.3	0.8	7.8	8.6	7.1	2	3.7	1.1	2.4	0.8	1.7	2.3		6.9	6.8
Zr	78.5	40.1	45.3	45.1	40.9	41	66.3	58.8	332	131.5	23.3	108.4	118.8	99.9	70.1	173.9	46	103.1	41	83.4	84.6		147.5	118.9
Y	24.9	13.7	16.3	15.9	13.5	15.6	22.2	19.8	49	26.5	14.9	29.8	30.7	26.4	25	37.9	15.9	26	16.7	22	25.6		26.3	26.1
Sr	282.1	126.2	534.7	554.5	136.8	195.6	122.7	171	98.1	103.5	411.3	270.3	336.4	416.7	486.5	471.1	483.4	609.2	389.4	462.2	311.9		254.9	209.1
Rb	3	0.4	5.2	6.3	0.3	4.2	45.5	12.7	24.7	45.1	13.6	10.4	18.5	6.4	15.8	5	12	8.6	5.1	5.1	6.4		51.3	72.9
